# Supplementary material
Source: PubMed Central journal article supplement (PMC7195331)
Supplement: mmc1.pdf [file mmc1.pdf]

# THE LANCET

## Supplementary appendix

This appendix formed part of the original submission and has been peer reviewed. We post it as supplied by the authors.

Supplement to: Leung K, Wu JT, Liu D, Leung GM. First-wave COVID-19 transmissibility and severity in China outside Hubei after control measures, and second-wave scenario planning: a modelling impact assessment. *Lancet* 2020; published online April 8. [http://dx.doi.org/10.1016/S0140-6736\(20\)30746-7](http://dx.doi.org/10.1016/S0140-6736(20)30746-7).

## Supplementary Information

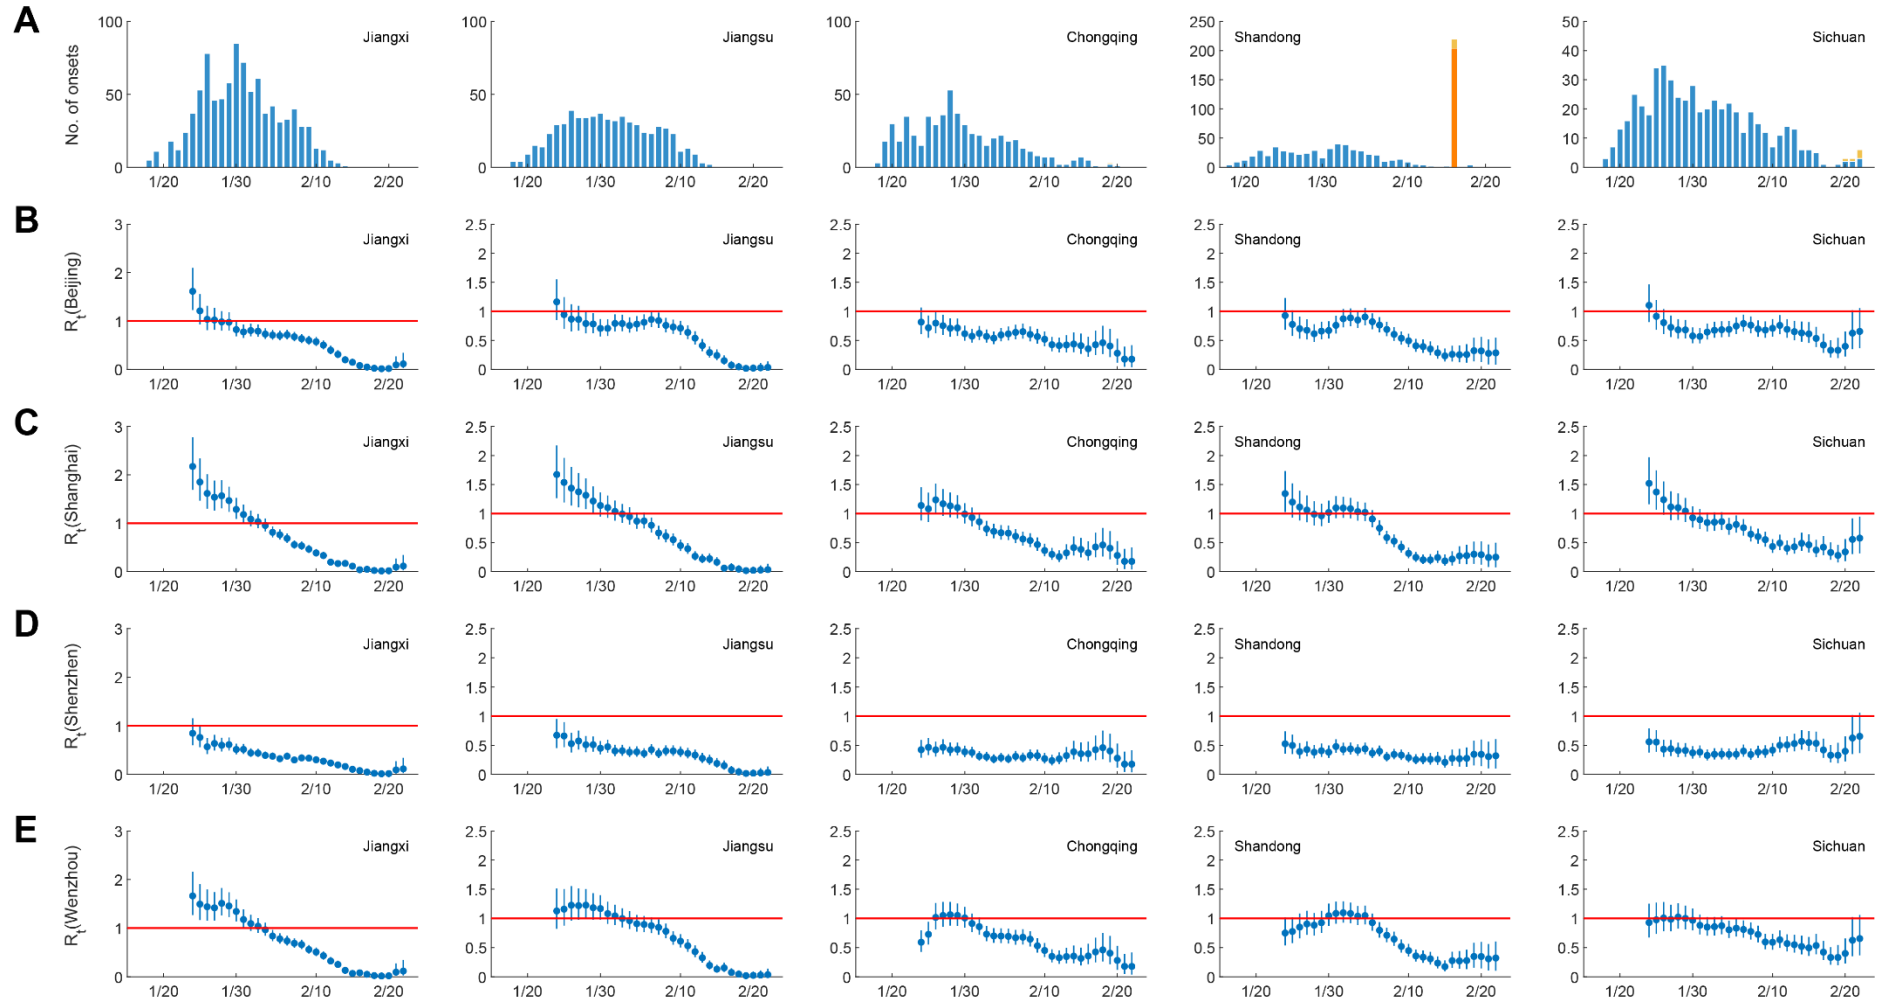

**Figure S1. Estimates of  $R_t$  of Jiangxi, Jiangsu, Chongqing, Shandong and Sichuan.** (A) The epidemic curves by estimated date of illness onset stratified by reported cases (blue) and estimated cases not reported yet due to the time delay between onset and reporting (yellow). We assumed the distribution of the time between onset and reporting in all provinces was the same as Beijing, with a mean of 4.9 days. The epidemic curves were estimated from cases reported on or before 29 February 2020. The Rencheng prison cluster (orange) reported on 21 February in Shandong was not included in the  $R_t$  estimation. (B-E) The estimates of  $R_t$  assuming the daily proportion of imported cases from Hubei was the same as Beijing, Shanghai, Shenzhen and Wenzhou.

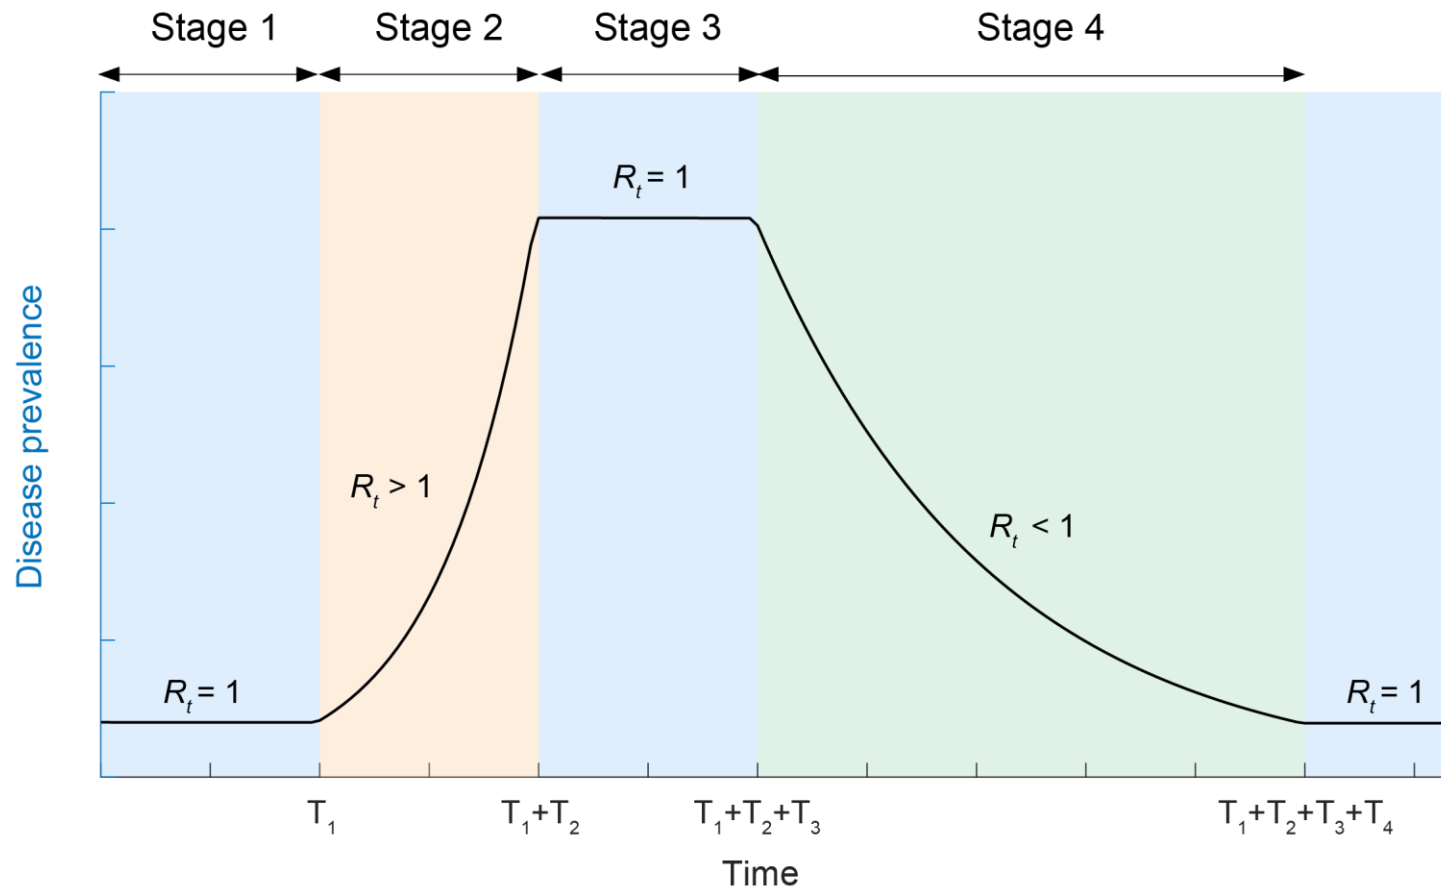

**Figure S2. Simulating the adverse effects of relaxation of interventions.** Stage 1: Interventions were implemented such that  $R_t = 1$ ; Stage 2: Interventions were relaxed resulting in  $R_t = R_2 > 1$  when stage 2 began; Stage 3: Interventions from stage 1 were again implemented such that  $R_t = 1$ ; Stage 4: Interventions more aggressive than that in stages 1 and 3 ( $R_t = R_4 < 1$  at the start of stage 4) were implemented in order to push the disease prevalence back to pre-relaxation level (i.e. stage 1 level).  $T_i$  is the duration of stage  $i$ .

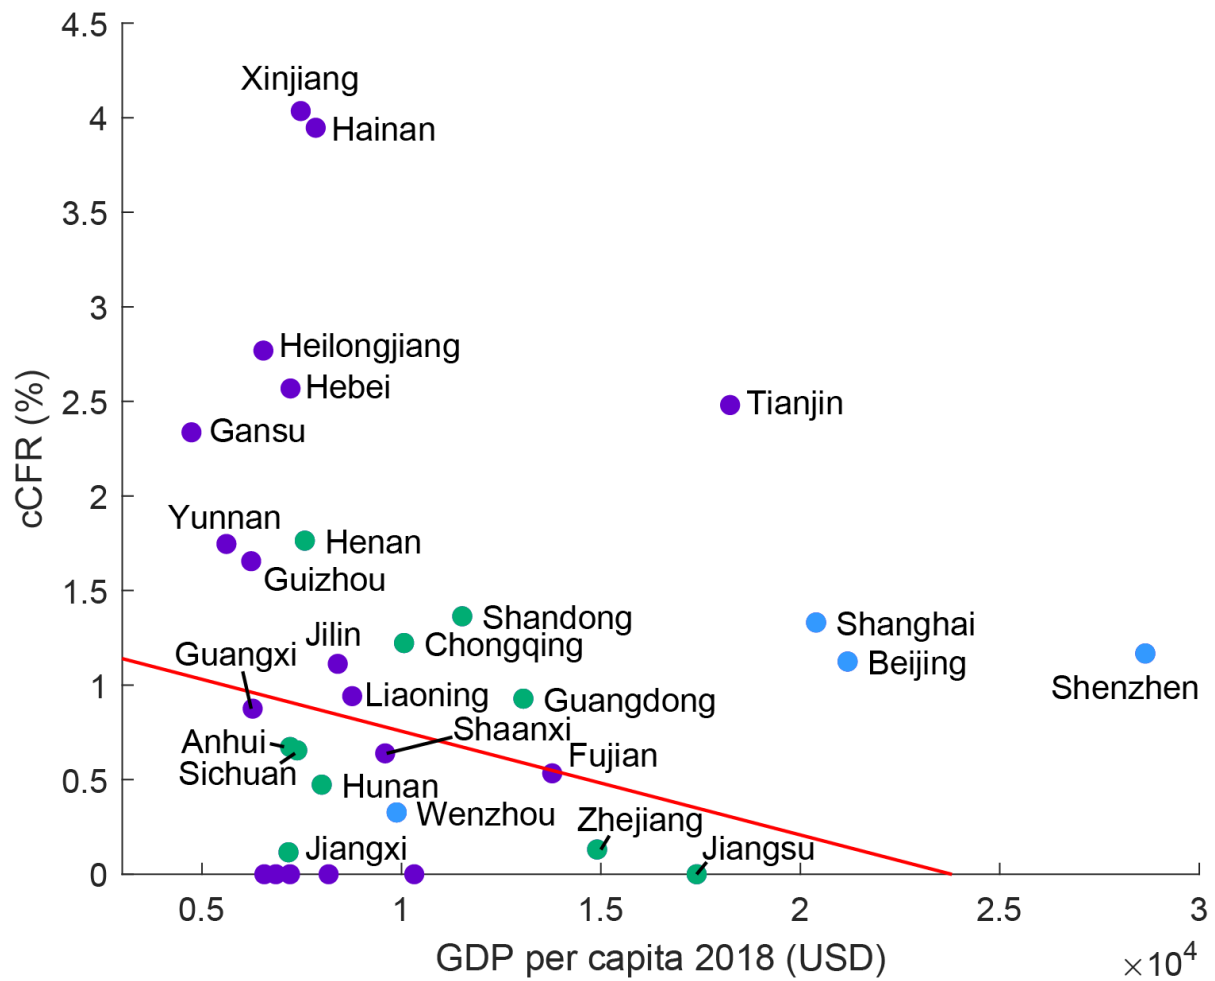

**Figure S3. Correlation of cCFR and GDP per capita in Beijing, Shanghai, Shenzhen and Wenzhou and in provinces outside Hubei.** Dots in blue show Beijing, Shanghai, Shenzhen and Wenzhou; dots in green show the ten provinces that reported largest number of cases; dots in purple show the other provinces. The red line is the univariate linear regression line using cCFR and GDP per capita from the ten provinces that reported the largest number of cases. The Pearson's correlation coefficient is -0.34 (p-value = 0.33).

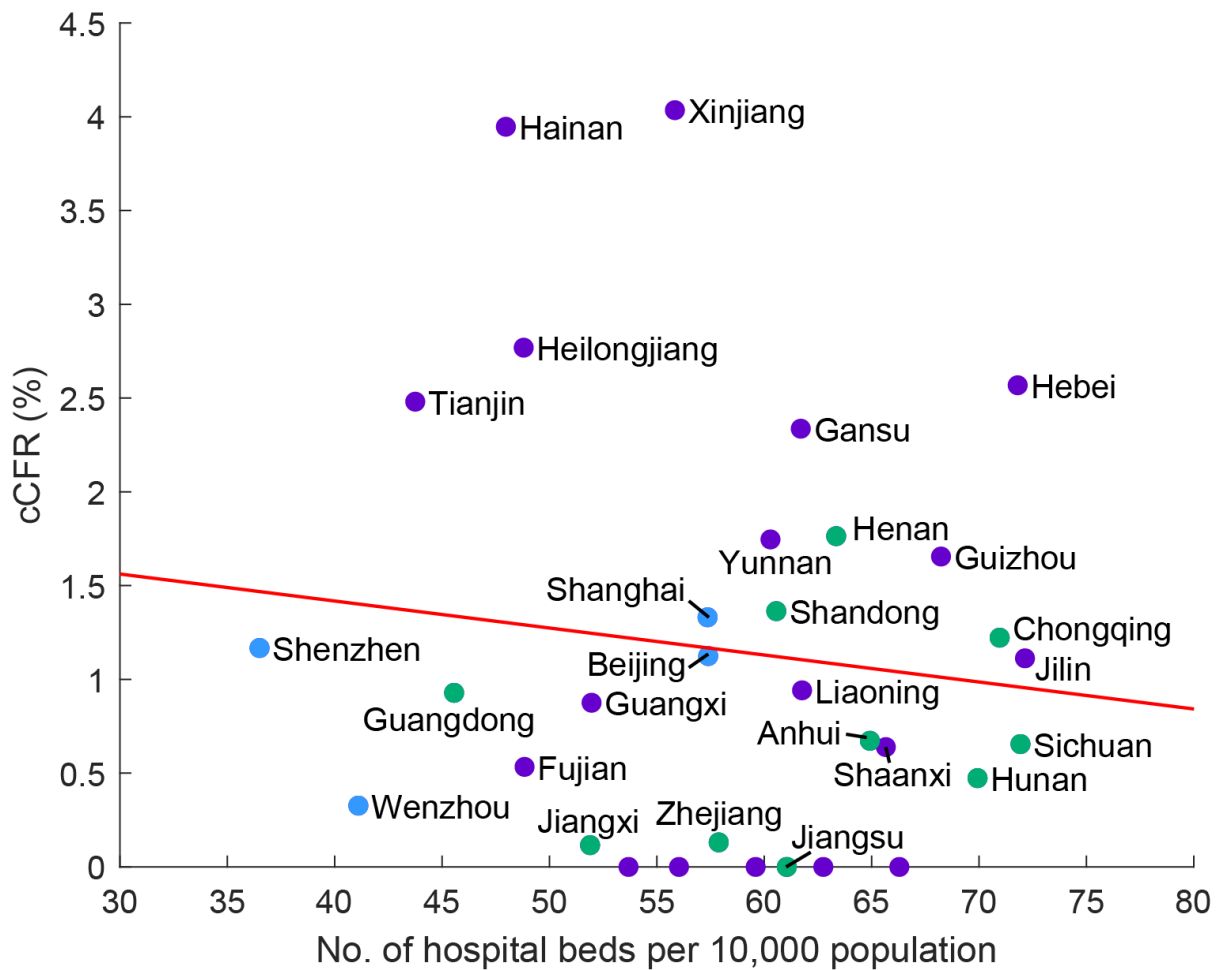

**Figure S4. Correlation of cCFR and the number of hospital beds per 10,000 in Beijing, Shanghai, Shenzhen and Wenzhou and in provinces outside Hubei.** Dots in blue show Beijing, Shanghai, Shenzhen and Wenzhou; dots in green show the ten provinces that reported largest number of cases; dots in purple show the other provinces. The red line is the univariate linear regression line using cCFR and the no. of hospital beds per 10,000 from all the 31 provinces. The Pearson's correlation coefficient is -0.13 (p-value = 0.50).

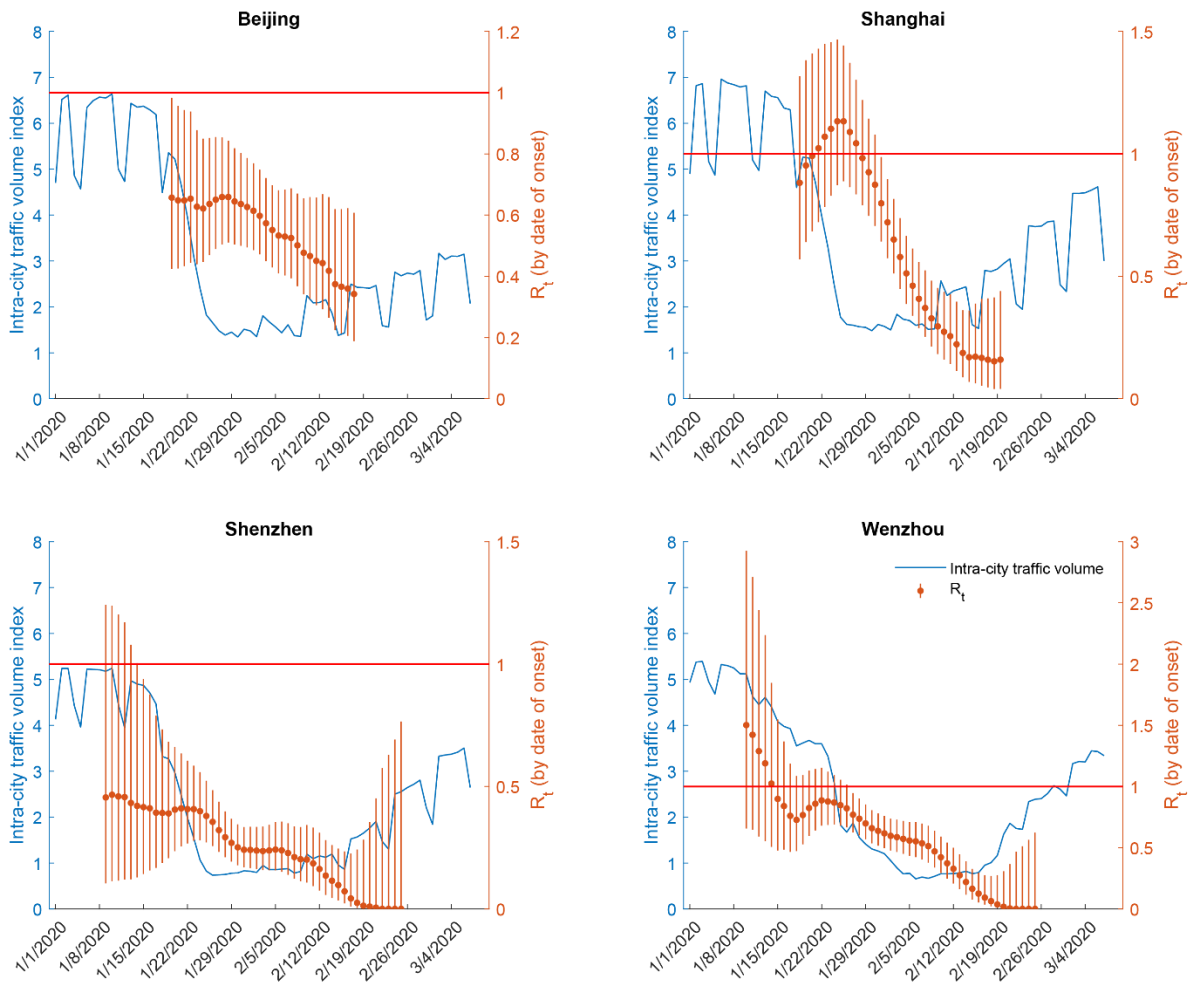

**Figure S5. Estimates of  $R_t$  in Beijing, Shanghai, Shenzhen and Wenzhou and the Baidu index of intra-city traffic volumes in January-February 2020.**  $R_t$  estimates are 7-day moving averages of those in Figure 2. Indices of intra-city traffic volumes were obtained from <https://qianxi.baidu.com/>. The Baidu index of intra-city traffic volume is a normalized ratio of a city's population with intra-city movement within 24 hours to a city's residential population, though the precise details of the normalization algorithm have not been made available on the Baidu Qianxi website.

**Table S1. Dates of symptom onset of infector-infectee pairs**

| Region    | Age of index patient | Sex of index patient | Date of arrival of index patient | Date of onset of index patient | Age of secondary patient | Sex of secondary patient | Date of onset of secondary patient | Serial interval | Source of secondary patient |
|-----------|----------------------|----------------------|----------------------------------|--------------------------------|--------------------------|--------------------------|------------------------------------|-----------------|-----------------------------|
| Wuhan     | 61                   | M                    |                                  | 12/20/2019                     | 57                       | F                        | 12/25/2019                         | 5               | Li et al, NEJM              |
| Wuhan     | 61                   | M                    |                                  | 12/20/2019                     | 31                       | F                        | 12/29/2019                         | 9               | Li et al, NEJM              |
| Wuhan     | 62                   | F                    |                                  | 12/27/2019                     | 64                       | M                        | 1/3/2020                           | 7               | Li et al, NEJM              |
| Wuhan     | 49                   | M                    |                                  | 12/12/2019                     | 78                       | M                        | 12/19/2019                         | 7               | Li et al, NEJM              |
| Wuhan     | 52                   | F                    |                                  | 12/21/2019                     | 25                       | F                        | 12/24/2019                         | 3               | Li et al, NEJM              |
| Huanggang | 32                   | M                    |                                  | 1/4/2020                       | 28                       | F                        | 1/11/2020                          | 7               | Li et al, NEJM              |
| Shenzhen  | 65, 66, 37, 36       | F, M, F, M           | 1/4/2020                         | 1/1/2020 - 1/4/2020            | 63                       | F                        | 1/8/2020                           | 4-7             | Chan et al, Lancet          |
| Chicago   | 60+                  | F                    | 1/13/2020                        | 1/22/2020 - 1/23/2020          | 60+                      | M                        | 1/28/2020                          | 5-6             | 6th case in US              |
| Taiwan    | 40+                  | M                    | 1/12/2020                        | 1/21/2020                      | 40+                      | F                        | 1/27/2020                          | 6               | 9th case in Taiwan          |
| Hong Kong | 73, 72               | F, M                 | 1/22/2020                        | 1/22/2020 - 1/25/2020          | 37                       | F                        | 1/28/2020                          | 3-6             | 11th case in Hong Kong      |
| Hong Kong | 39                   | M                    | 1/23/2020                        | 1/29/2020                      | 72                       | F                        | 2/1/2020                           | 3               | 15th case in Hong Kong      |
| Singapore | 28                   | F                    | Local infection                  | 1/29/2020                      | 45                       | M                        | 2/1/2020                           | 3               | 27th case in Singapore      |
| Singapore | 28                   | F                    | Local infection                  | 1/29/2020                      | 44                       | F                        | 2/2/2020                           | 4               | 21st case in Singapore      |
| Vietnam   | 23                   | F                    | 1/17/2020                        | 1/25/2020                      | 42                       | F                        | 1/31/2020                          | 6               | 10th case in Vietnam        |
| Vietnam   | 23                   | F                    | 1/17/2020                        | 1/25/2020                      | 49                       | F                        | 2/3/2020                           | 9               | 11th case in Vietnam        |
| Vietnam   | 23                   | F                    | 1/17/2020                        | 1/25/2020                      | 16                       | F                        | 2/3/2020                           | 9               | 12th case in Vietnam        |
| Hong Kong | 60                   | M                    | Local infection                  | 1/22/2020                      | 28                       | F                        | 1/30/2020                          | 8               | 19th case in Hong Kong      |
| Hong Kong | 60, 28               | M, F                 | Local infection                  | 1/22/2020 - 1/30/2020          | 56                       | F                        | 2/4/2020                           | 6-14            | 20th case in Hong Kong      |
| Malaysia  | 42                   | M                    | 1/23/2020                        | 1/29/2020                      | 40                       | F                        | 2/1/2020                           | 3               | 14th case in Malaysia       |
| Shenzhen  | 64                   | F                    | Local infection                  | 1/4/2020                       | 69                       | M                        | 1/12/2020                          | 8               | 12nd case                   |
| Shenzhen  | 69                   | M                    | 1/15/2020                        | 1/12/2020                      | 25                       | F                        | 1/25/2020                          | 13              | 188th case                  |
| Shenzhen  | 64, 71               | F, M                 | 1/12/2020                        | 1/12/2020 - 1/15/2020          | 38                       | F                        | 1/22/2020                          | 7-10            | 39th case                   |
| Shenzhen  | 73                   | M                    | 1/19/2020                        | 1/20/2020                      | 49                       | M                        | 1/24/2020                          | 4               | 68th case                   |
| Shenzhen  | 73                   | M                    | 1/19/2020                        | 1/20/2020                      | 49                       | F                        | 1/22/2020                          | 2               | 69th case                   |
| Shenzhen  | 62                   | F                    | 1/22/2020                        | 1/19/2020                      | 43                       | F                        | 2/4/2020                           | 16              | 320th case                  |



|          |                           |         |                            |                       |       |   |           |       |                        |
|----------|---------------------------|---------|----------------------------|-----------------------|-------|---|-----------|-------|------------------------|
| Shenzhen | 30                        | F       | 1/21/2020                  | 1/22/2020             | 38    | F | 1/28/2020 | 6     | 108th case             |
| Shenzhen | 61                        | M       | 1/22/2020                  | 1/24/2020             | 35    | F | 1/26/2020 | 2     | 120th case             |
| Shenzhen | 61                        | M       | 1/22/2020                  | 1/24/2020             | 39    | M | 1/26/2020 | 2     | 121st case             |
| Shenzhen | 61, 35, 39                | M, F, M | 1/24/2020                  | 1/24/2020 - 1/26/2020 | 2     | M | 2/5/2020  | 10-12 | 327th case             |
| Shenzhen | 61, 35, 39                | M, F, M | 1/22/2020                  | 1/24/2020 - 1/26/2020 | 62    | F | 2/5/2020  | 10-12 | 345th case             |
| Shenzhen | 64                        | F       | 1/22/2020                  | 1/17/2020             | 37    | F | 1/28/2020 | 11    | 275th case             |
| Shenzhen | 34                        | M       | 1/20/2020                  | 1/20/2020             | 32    | M | 1/23/2020 | 3     | 100th case             |
| Shenzhen | 34                        | M       | 1/20/2020                  | 1/20/2020             | 32    | M | 1/25/2020 | 5     | 101st case             |
| Shenzhen | 34                        | M       | 1/20/2020                  | 1/20/2020             | 34    | M | 1/26/2020 | 6     | 102nd case             |
| Shenzhen | 64                        | M       | 1/17/2020                  | 1/18/2020             | 37    | M | 1/24/2020 | 6     | 169th case             |
| Shenzhen | 78                        | M       | 1/16/2020                  | 1/26/2020             | 78    | F | 1/30/2020 | 4     | 283rd case             |
| Shenzhen | 59, 61                    | F, M    | 1/21/2020                  | 1/24/2020             | 34    | F | 1/25/2020 | 1     | 253rd case             |
| Shenzhen | 50                        | F       | Local infection            | 1/26/2020             | 37    | F | 2/5/2020  | 10    | 354th case             |
| Shenzhen | 42                        | M       | Local infection            | 1/20/2020             | 6     | M | 2/6/2020  | 17    | 340th case             |
| Shenzhen | 69                        | M       | Local infection            | 1/21/2020             | 66    | F | 2/2/2020  | 12    | 335th case             |
| Shenzhen | 69                        | M       | 1/20/2020                  | 2/9/2020              | 69    | F | 2/10/2020 | 1     | 402nd case             |
| Shenzhen | 69                        | M       | 1/20/2020                  | 2/9/2020              | 49    | M | 2/10/2020 | 1     | 397th case             |
| Zhuhai   | 78, 76                    | M, F    | 1/11/2020                  | 1/15/2020-1/18/2020   | 49    | F | 1/18/2020 | 0-3   | 3rd case               |
| Zhuhai   | 37                        | F       | 1/22/2020                  | 1/26/2020             | 67    | F | 1/26/2020 | 0-1   | 45th case              |
| Nanjing  | P6, P7                    | M, F    | Local infection            | 1/27/2020-1/28/2020   | P8    | M | 2/1/2020  | 4-5   | Huang et al, Lancet ID |
| Nanjing  | P6, P7                    | M, F    | Local infection            | 1/27/2020-1/28/2020   | P9    | F | 1/28/2020 | 0-1   | Huang et al, Lancet ID |
| Nanjing  | P6, P7, P9                | M, F, F | Local infection            | 1/27/2020-1/28/2020   | P10   | M | 1/31/2020 | 3-4   | Huang et al, Lancet ID |
| Nanjing  | P4                        | M       | Local infection            | 1/25/2020             | P5    | F | 1/27/2020 | 2     | Huang et al, Lancet ID |
| Nanjing  | P1, P2, P3, P4, P6, P7    | -       | Local infection            | 1/25/2020-1/31/2020   | Index | M | 1/28/2020 | -3-3  | Huang et al, Lancet ID |
| Nanjing  | Index, P2, P3, P4, P6, P7 | -       | 1/21/2020, Local infection | 1/25/2020-1/31/2020   | P1    | F | 1/26/2020 | -5-1  | Huang et al, Lancet ID |
| Nanjing  | Index, P1, P3, P4, P6, P7 | -       | 1/21/2020, Local infection | 1/25/2020-1/31/2020   | P2    | F | 1/25/2020 | -6-1  | Huang et al, Lancet ID |
| Nanjing  | Index, P1, P2, P4, P6, P7 | -       | 1/21/2020, Local infection | 1/25/2020-1/28/2020   | P3    | F | 1/31/2020 | 3-6   | Huang et al, Lancet ID |
| Nanjing  | Index, P1, P2, P3, P6, P7 | -       | 1/21/2020, Local infection | 1/25/2020-1/31/2020   | P4    | M | 1/25/2020 | -6-1  | Huang et al, Lancet ID |

|         |                              |   |                               |                     |    |   |           |      |                        |
|---------|------------------------------|---|-------------------------------|---------------------|----|---|-----------|------|------------------------|
| Nanjing | Index, P1, P2,<br>P3, P4, P7 | - | 1/21/2020,<br>Local infection | 1/25/2020-1/31/2020 | P6 | M | 1/28/2020 | -3-3 | Huang et al, Lancet ID |
| Nanjing | Index, P1, P2,<br>P3, P4, P6 | - | 1/21/2020,<br>Local infection | 1/25/2020-1/31/2020 | P7 | F | 1/27/2020 | -4-2 | Huang et al, Lancet ID |

**Table S2. The time between onset and death or the time between admission and death for 41 death cases of 2019-nCoV in Wuhan**

| Sex | Age | Date of symptom onset | Date of first admission | Death date | Time between onset to death | Time between admission to death |
|-----|-----|-----------------------|-------------------------|------------|-----------------------------|---------------------------------|
| M   | 61  | 12/20/2019            | 12/27/2019              | 1/9/2020   | 20                          | 13                              |
| M   | 69  | 12/25/2019            | 12/31/2019              | 1/15/2020  | 21                          | 15                              |
| M   | 89  | 1/5/2020              | 1/8/2020                | 1/18/2020  | 13                          | 10                              |
| M   | 89  | 1/13/2020             | 1/13/2020               | 1/19/2020  | 6                           | 6                               |
| M   | 75  | 1/4/2020              | 1/11/2020               | 1/20/2020  | 16                          | 9                               |
| F   | 69  |                       | 1/14/2020               | 1/20/2020  |                             | 6                               |
| M   | 66  | 1/10/2020             | 1/16/2020               | 1/20/2020  | 10                          | 4                               |
| F   | 48  | 12/10/2019            | 12/10/2019              | 1/20/2020  | 41                          | 41                              |
| M   | 86  | 1/2/2020              | 1/9/2020                | 1/21/2020  | 19                          | 12                              |
| F   | 85  |                       | 11/26/2019              | 1/21/2020  |                             | 56                              |
| M   | 82  | 1/9/2020              | 1/14/2020               | 1/21/2020  | 12                          | 7                               |
| M   | 81  | 1/9/2020              | 1/13/2020               | 1/21/2020  | 12                          | 8                               |
| F   | 70  |                       | 1/13/2020               | 1/21/2020  |                             | 8                               |
| F   | 66  | 1/8/2020              | 1/19/2020               | 1/21/2020  | 13                          | 2                               |
| M   | 66  | 12/22/2019            | 12/22/2019              | 1/21/2020  | 30                          | 30                              |
| M   | 66  |                       | 1/11/2020               | 1/21/2020  |                             | 10                              |
| M   | 65  | 1/5/2020              | 1/11/2020               | 1/21/2020  | 16                          | 10                              |
| M   | 53  |                       | 1/13/2020               | 1/21/2020  |                             | 8                               |
| M   | 84  | 1/6/2020              | 1/9/2020                | 1/22/2020  | 16                          | 13                              |
| F   | 82  | 1/3/2020              | 1/3/2020                | 1/22/2020  | 19                          | 19                              |
| M   | 81  |                       | 1/18/2020               | 1/22/2020  |                             | 4                               |
| F   | 80  |                       | 1/11/2020               | 1/22/2020  |                             | 11                              |
| M   | 73  | 12/30/2019            | 1/5/2020                | 1/22/2020  | 23                          | 17                              |
| F   | 70  |                       | 1/18/2020               | 1/22/2020  |                             | 4                               |
| M   | 87  | 1/12/2020             | 1/19/2020               | 1/23/2020  | 11                          | 4                               |
| F   | 82  | 1/10/2020             | 1/17/2020               | 1/23/2020  | 13                          | 6                               |
| M   | 72  | 1/11/2020             | 1/18/2020               | 1/23/2020  | 12                          | 5                               |
| M   | 70  | 1/15/2020             | 1/19/2020               | 1/23/2020  | 8                           | 4                               |
| F   | 67  | 1/10/2020             | 1/12/2020               | 1/24/2020  | 14                          | 12                              |
| M   | 65  | 1/12/2020             | 1/16/2020               | 1/23/2020  | 11                          | 7                               |
| M   | 58  | 1/1/2020              | 1/1/2020                | 1/24/2020  | 23                          | 23                              |
| M   | 36  | 1/6/2020              | 1/9/2020                | 1/23/2020  | 17                          | 14                              |
| M   | 79  | 1/11/2020             | 1/17/2020               | 1/24/2020  | 13                          | 7                               |
| M   | 78  | 1/13/2020             | 1/23/2020               | 1/24/2020  | 11                          | 1                               |
| F   | 76  |                       | 1/5/2020                | 1/24/2020  |                             | 19                              |
| M   | 67  | 1/10/2020             | 1/15/2020               | 1/24/2020  | 14                          | 9                               |
| M   | 58  | 1/3/2020              | 1/18/2020               | 1/24/2020  | 21                          | 6                               |
| M   | 55  | 1/8/2020              | 1/19/2020               | 1/24/2020  | 16                          | 5                               |
| F   | 73  |                       | 1/23/2020               | 1/28/2020  |                             | 5                               |
| F   | 73  |                       |                         | 1/26/2020  |                             |                                 |
| F   | 31  | 1/21/2020             | 1/23/2020               | 1/26/2020  | 5                           | 3                               |

**Table S3. GDP per capita in 2017 and the number of hospital beds per 10,000 in 2018 for the 31 provinces, Shenzhen and Wenzhou in mainland China**

| <b>Province or city</b> | <b>GDP per capita in 2018 (Chinese Yuan)</b> | <b>GDP per capita in 2018 (USD)</b> | <b>Number of hospital beds per 10,000 in 2018</b> |
|-------------------------|----------------------------------------------|-------------------------------------|---------------------------------------------------|
| Shenzhen                | 189,600                                      | 28,647                              | 36.5                                              |
| Beijing                 | 140,211                                      | 21,184                              | 57.39                                             |
| Shanghai                | 134,982                                      | 20,394                              | 57.36                                             |
| Tianjin                 | 120,711                                      | 18,238                              | 43.75                                             |
| Jiangsu                 | 115,168                                      | 17,401                              | 61.05                                             |
| Zhejiang                | 98,643                                       | 14,904                              | 57.88                                             |
| Fujian                  | 91,197                                       | 13,779                              | 48.84                                             |
| Guangdong               | 86,412                                       | 13,056                              | 45.56                                             |
| Shandong                | 76,267                                       | 11,523                              | 60.56                                             |
| Inner Mongolia          | 68,302                                       | 10,320                              | 62.75                                             |
| Chongqing               | 66,616                                       | 10,065                              | 70.96                                             |
| Hubei                   | 65,933                                       | 9,962                               | 66.51                                             |
| Wenzhou                 | 65,388                                       | 9,879                               | 41.1                                              |
| Shaanxi                 | 63,477                                       | 9,591                               | 65.66                                             |
| Liaoning                | 58,008                                       | 8,764                               | 61.76                                             |
| Jilin                   | 55,611                                       | 8,402                               | 72.14                                             |
| Ningxia                 | 54,094                                       | 8,173                               | 59.6                                              |
| Hunan                   | 52,949                                       | 8,000                               | 69.93                                             |
| Hainan                  | 51,955                                       | 7,850                               | 47.97                                             |
| Henan                   | 50,152                                       | 7,577                               | 63.35                                             |
| Xinjiang                | 49,475                                       | 7,475                               | 55.84                                             |
| Sichuan                 | 48,883                                       | 7,386                               | 71.93                                             |
| Hebei                   | 47,772                                       | 7,218                               | 71.8                                              |
| Anhui                   | 47,712                                       | 7,209                               | 64.92                                             |
| Qinghai                 | 47,690                                       | 7,205                               | 53.68                                             |
| Jiangxi                 | 47,434                                       | 7,167                               | 51.89                                             |
| Shanxi                  | 45,328                                       | 6,849                               | 56.03                                             |
| Tibet                   | 43,433                                       | 6,562                               | 66.29                                             |
| Heilongjiang            | 43,274                                       | 6,538                               | 48.8                                              |
| Guangxi                 | 41,489                                       | 6,269                               | 51.96                                             |
| Guizhou                 | 41,244                                       | 6,232                               | 68.23                                             |
| Yunnan                  | 37,136                                       | 5,611                               | 60.29                                             |
| Gansu                   | 31,336                                       | 4,735                               | 61.7                                              |

**Table S4. Baidu population outflow index from Hubei and the proportion of the population outflow from Hubei to Beijing, Shanghai, Shenzhen and Wenzhou, in January and February 2020 (www.qianxi.baidu.com)**

| Date      | Population outflow index from Hubei* | Percentage in the population outflow from Hubei |          |          |         |
|-----------|--------------------------------------|-------------------------------------------------|----------|----------|---------|
|           |                                      | Beijing                                         | Shanghai | Shenzhen | Wenzhou |
| 1/1/2020  | 2.56                                 | 3                                               | 2.82     | 2.79     | 0.58    |
| 1/2/2020  | 3.13                                 | 3.63                                            | 2.87     | 2.92     | 0.74    |
| 1/3/2020  | 4.26                                 | 3.31                                            | 2.8      | 2.57     | 0.65    |
| 1/4/2020  | 4.88                                 | 3.08                                            | 2.71     | 2.58     | 0.67    |
| 1/5/2020  | 4.58                                 | 4.07                                            | 3.09     | 2.65     | 0.65    |
| 1/6/2020  | 4.67                                 | 3.78                                            | 2.7      | 2.25     | 0.67    |
| 1/7/2020  | 5.11                                 | 3.53                                            | 2.67     | 2.19     | 0.67    |
| 1/8/2020  | 5.77                                 | 3.47                                            | 2.58     | 2.1      | 0.68    |
| 1/9/2020  | 6.32                                 | 3                                               | 2.38     | 2.22     | 0.71    |
| 1/10/2020 | 5.3                                  | 3.1                                             | 2.44     | 2.05     | 0.69    |
| 1/11/2020 | 5.16                                 | 2.7                                             | 2.37     | 2.07     | 0.66    |
| 1/12/2020 | 4.69                                 | 2.66                                            | 2.06     | 2.14     | 0.57    |
| 1/13/2020 | 4.69                                 | 2.97                                            | 2.44     | 2.15     | 0.63    |
| 1/14/2020 | 4.6                                  | 2.81                                            | 2.2      | 1.86     | 0.63    |
| 1/15/2020 | 4.86                                 | 2.58                                            | 2        | 1.92     | 0.69    |
| 1/16/2020 | 4.85                                 | 2.65                                            | 2.01     | 1.85     | 0.66    |
| 1/17/2020 | 5.1                                  | 2.28                                            | 1.81     | 1.8      | 0.63    |
| 1/18/2020 | 5.42                                 | 1.92                                            | 1.58     | 1.73     | 0.7     |
| 1/19/2020 | 5.49                                 | 1.77                                            | 1.45     | 1.81     | 0.68    |
| 1/20/2020 | 6.03                                 | 1.53                                            | 1.3      | 1.78     | 0.76    |
| 1/21/2020 | 7.21                                 | 1.44                                            | 1.13     | 1.87     | 0.75    |
| 1/22/2020 | 6.8                                  | 1.41                                            | 1.14     | 1.98     | 0.71    |
| 1/23/2020 | 6.21                                 | 1.43                                            | 1.36     | 2.1      | 0.63    |
| 1/24/2020 | 4.59                                 | 1.86                                            | 2        | 3.21     | 0.6     |
| 1/25/2020 | 4.39                                 | 2.85                                            | 2.71     | 5.63     | 0.48    |
| 1/26/2020 | 5.2                                  | 3.14                                            | 3.23     | 10.62    | 0.68    |
| 1/27/2020 | 1.98                                 | 2.65                                            | 2.95     | 12.06    | 0.74    |
| 1/28/2020 | 0.87                                 | 2.15                                            | 2.3      | 9.57     | 0.65    |
| 1/29/2020 | 0.54                                 | 1.61                                            | 1.83     | 8.05     | 0.61    |
| 1/30/2020 | 0.4                                  | 1.12                                            | 1.4      | 5.17     | 0.39    |
| 1/31/2020 | 0.37                                 | 1.07                                            | 1.19     | 4.74     | 0.35    |
| 2/1/2020  | 0.33                                 | 0.96                                            | 1.16     | 3.68     | 0.23    |
| 2/2/2020  | 0.48                                 | 1.22                                            | 1.75     | 3.39     | 0.39    |
| 2/3/2020  | 0.34                                 | 1.02                                            | 1.48     | 4.05     | 0.15    |
| 2/4/2020  | 0.32                                 | 1.16                                            | 1.37     | 2.85     | 0.21    |
| 2/5/2020  | 0.31                                 | 1.2                                             | 1.15     | 3.02     | 0.11    |
| 2/6/2020  | 0.31                                 | 1.1                                             | 1.65     | 2.72     | 0.15    |
| 2/7/2020  | 0.3                                  | 0.86                                            | 1.47     | 2.53     | 0.11    |
| 2/8/2020  | 0.31                                 | 0.73                                            | 1.59     | 2.89     | 0.09    |
| 2/9/2020  | 0.32                                 | 1.01                                            | 1.44     | 2.79     | 0.09    |

|           |      |      |      |      |      |
|-----------|------|------|------|------|------|
| 2/10/2020 | 0.33 | 1.06 | 1.6  | 2.8  | 0.07 |
| 2/11/2020 | 0.32 | 1.18 | 1.81 | 2.62 | 0.16 |
| 2/12/2020 | 0.34 | 1.11 | 1.63 | 3.08 | 0.08 |
| 2/13/2020 | 0.39 | 1.16 | 1.83 | 3.19 | 0.12 |
| 2/14/2020 | 0.49 | 1.11 | 1.81 | 3.38 | 0.09 |
| 2/15/2020 | 0.41 | 1.35 | 2.61 | 4.03 | 0.12 |
| 2/16/2020 | 0.36 | 1.05 | 2.12 | 4.46 | 0.09 |
| 2/17/2020 | 0.36 | 0.91 | 1.57 | 3.54 | 0.13 |
| 2/18/2020 | 0.38 | 0.81 | 2.33 | 3.83 | 0.12 |
| 2/19/2020 | 0.4  | 0.88 | 2.06 | 3.6  | 0.1  |
| 2/20/2020 | 0.42 | 0.83 | 2.25 | 4.02 | 0.07 |
| 2/21/2020 | 0.47 | 0.75 | 2.51 | 4.13 | 0.14 |
| 2/22/2020 | 0.58 | 0.67 | 2.78 | 4.51 | 0.21 |
| 2/23/2020 | 0.72 | 0.58 | 3.71 | 6.4  | 0.23 |
| 2/24/2020 | 0.82 | 0.58 | 3.28 | 6.94 | 0.21 |
| 2/25/2020 | 0.94 | 0.32 | 3.21 | 7.94 | 0.27 |
| 2/26/2020 | 0.9  | 0.31 | 3.08 | 9.13 | 0.36 |
| 2/27/2020 | 0.45 | 0.55 | 2.58 | 5.45 | 0.39 |
| 2/28/2020 | 0.32 | 0.8  | 1.31 | 2.95 | 0.33 |
| 2/29/2020 | 0.3  | 0.66 | 0.86 | 1.97 | 0.2  |

\* The Baidu population outflow index is a normalized ratio of a city/province's population traveling outside the city/province within 24 hours to a city/province's residential population, although the precise details of the normalization algorithm have not been made available on the Baidu Qianxi website.

## Supplementary Text

We used the following SIR model to simulate the scenarios in Figure 5.

$$\frac{dS(t)}{dt} = -\frac{S(t)Y(t)}{N} \frac{I(t)}{T_g}$$

$$\frac{dI(t)}{dt} = \frac{S(t)Y(t)}{N} \frac{I(t)}{T_g} - \frac{I(t)}{T_g}$$

$$Y(t) = \begin{cases} 1 & \text{if } 0 < t \leq T_1; \\ R_2 N/S(T_1) & \text{if } T_1 < t \leq T_1 + T_2; \\ N/S(T_1 + T_2) & \text{if } T_1 + T_2 < t \leq T_1 + T_2 + T_3; \\ R_4 N/S(T_1 + T_2 + T_3) & \text{if } T_1 + T_2 + T_3 < t \leq T_1 + T_2 + T_3 + T_4; \end{cases}$$

where  $N$  was the population size (assumed to be 10 million);  $S(t)$  and  $I(t)$  were the total number of susceptible and infectious individuals at time  $t$  (epidemic was seeded with 100 infections at time 0);  $T_g$  was the mean generation time (assumed to be 7 days);  $T_i$  was the duration of stage  $i$ ; and  $R_2$  and  $R_4$  were the reproductive number at the beginning of stages 2 and 4, respectively.

## Supplementary References

Source of information for events shown in Figure 1:

1. "Wuhan halts travel to contain coronavirus". China Daily. Retrieved 20 February 2020. <https://global.chinadaily.com.cn/a/202001/23/WS5e299a4ea3101282172730f2.html>
2. James Griffiths; Amy Woodyatt. "Wuhan coronavirus: Thousands of cases confirmed as China goes into emergency mode". CNN. Retrieved 20 February 2020. <https://edition.cnn.com/2020/01/26/asia/wuhan-coronavirus-update-intl-hnk/index.html>
3. "China to extend Spring Festival holiday to contain coronavirus outbreak". Xinhua. Retrieved 20 February 2020. [http://www.xinhuanet.com/english/2020-01/26/c\\_138735589.htm](http://www.xinhuanet.com/english/2020-01/26/c_138735589.htm)
4. Evelyn Cheng. "More than half of China extends shutdown over virus". CNBC. Retrieved 20 February 2020. <https://www.cnbc.com/2020/02/01/coronavirus-more-of-china-extend-shutdown-accounting-for-80percent-of-gdp.html>
5. Alice Yan. "China's private sector business capital on lockdown as coronavirus takes its toll". SCMP. Retrieved 20 February 2020. <https://www.scmp.com/news/china/society/article/3048610/chinas-private-sector-business-capital-lockdown-coronavirus>
6. "Under China's coronavirus lockdown, millions have nowhere to go". Reuters. Retrieved 20 February 2020. <https://www.reuters.com/article/us-china-health-scale/under-chinas-coronavirus-lockdown-millions-have-nowhere-to-go-idUSKBN2081DB>
7. "China Focus: Back to work, enterprises gradually resume operation amid epidemic outbreak". Xinhua. Retrieved 20 February 2020. [http://www.xinhuanet.com/english/2020-02/10/c\\_138771875.htm](http://www.xinhuanet.com/english/2020-02/10/c_138771875.htm)
8. Cao Yin and Zhou Lihua. "Hubei district launches wartime control order to better fight virus". China Daily. Retrieved 20 February 2020. <http://www.chinadaily.com.cn/a/202002/13/WS5e44ba07a310128217277470.html>
9. "China Gradually Gets Back to Work in Face of Worker, Material Shortages". Caixin. Retrieved 20 February 2020. <https://www.caixinglobal.com/2020-02-19/coronavirus-wednesday-update-death-toll-passes-2000-as-russia-announces-ban-on-chinese-citizens-101517506.html>
